# Supplementary material for: Different solutions lead to similar life history traits across the great divides of the amniote tree of life
Source: PubMed Central journal article supplement (PMC7869468; doi:10.1186/s40709-021-00134-9), 2021-02-08
Supplement: 40709_2021_134_MOESM2_ESM.pdf [file 40709_2021_134_MOESM2_ESM.pdf]

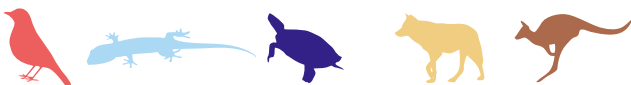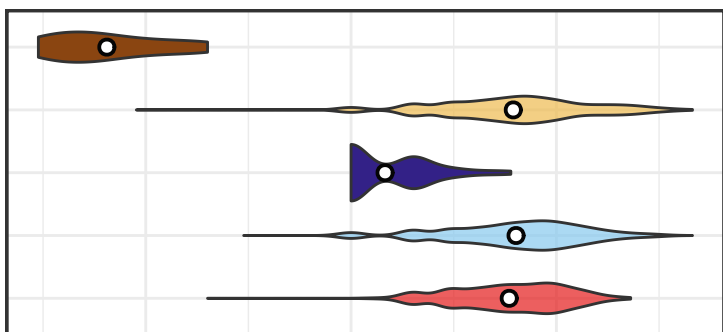

Offspring to female size ratio (Log10)

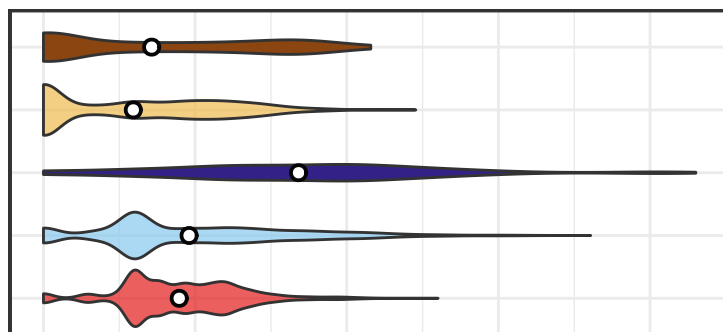

Brood size (Log10)

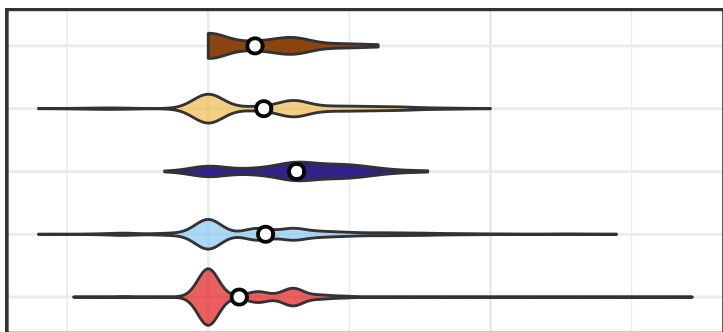

Broods per year (Log10)

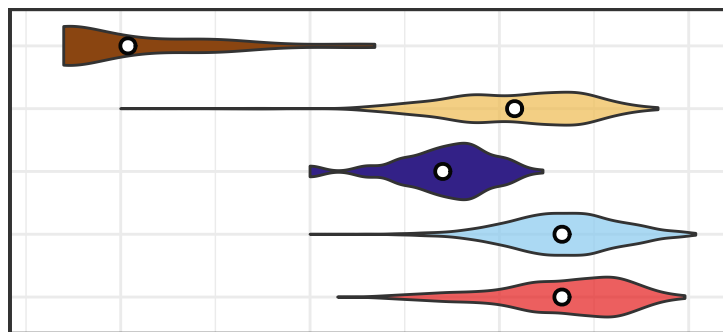

Relative brood mass (Log10)

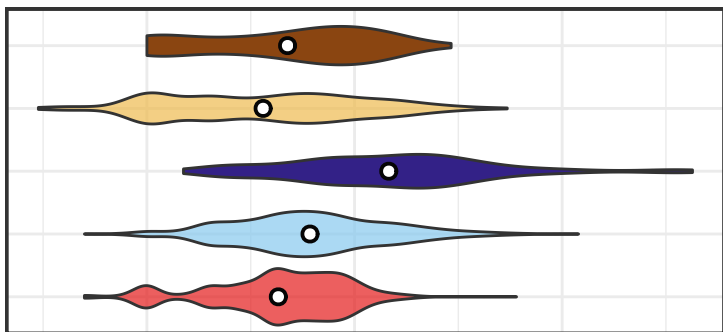

Young per year (Log10)

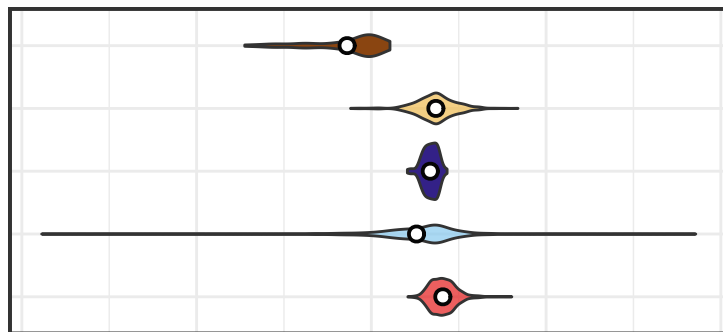

Productivity\*
